# Supplementary material for: MEK inhibitors reduce cellular expression of ACE2, pERK, pRb while stimulating NK-mediated cytotoxicity and attenuating inflammatory cytokines relevant to SARS-CoV-2 infection
Source: PubMed Central journal article supplement (PMC7679035; doi:10.18632/oncotarget.27799), 2020-11-17
Supplement: oncotarget-11-4201-s001.pdf [file oncotarget-11-4201-s001.pdf]

# MEK inhibitors reduce cellular expression of ACE2, pERK, pRb while stimulating NK-mediated cytotoxicity and attenuating inflammatory cytokines relevant to SARS-CoV-2 infection

## SUPPLEMENTARY MATERIALS

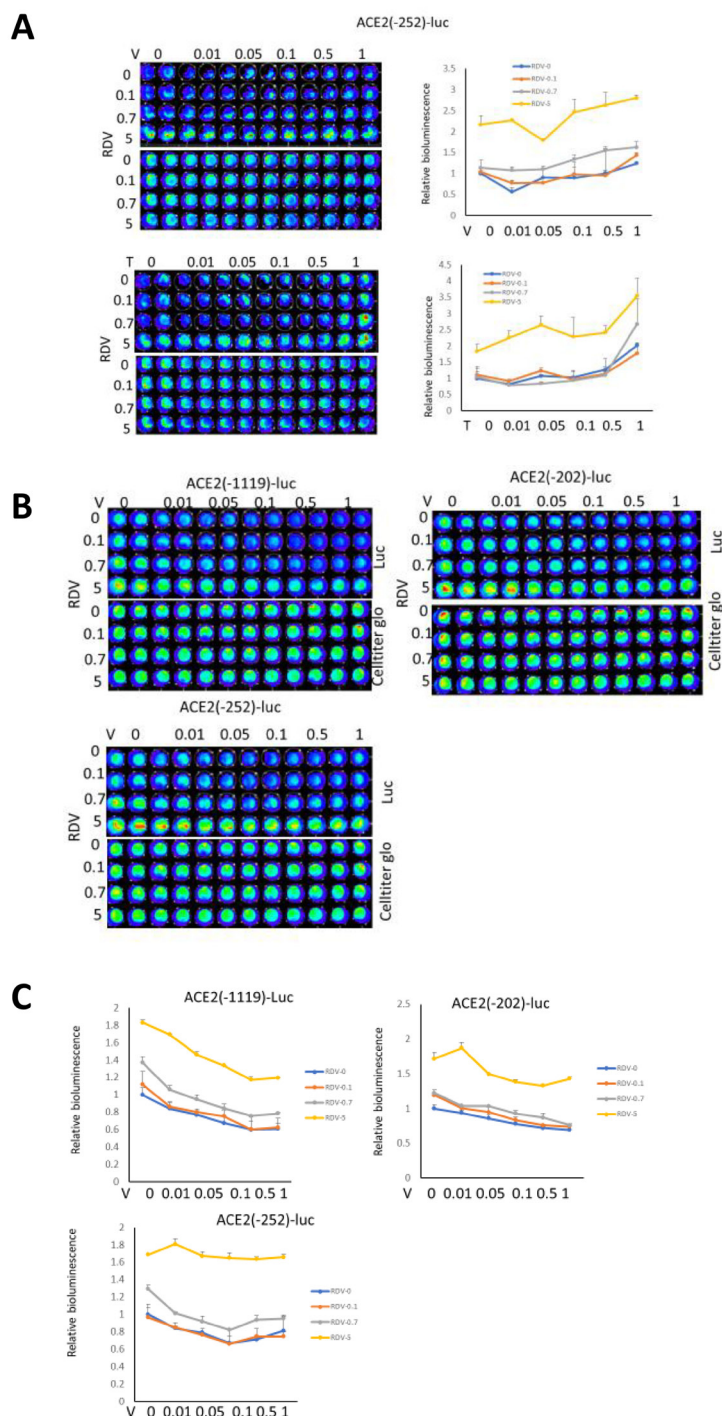

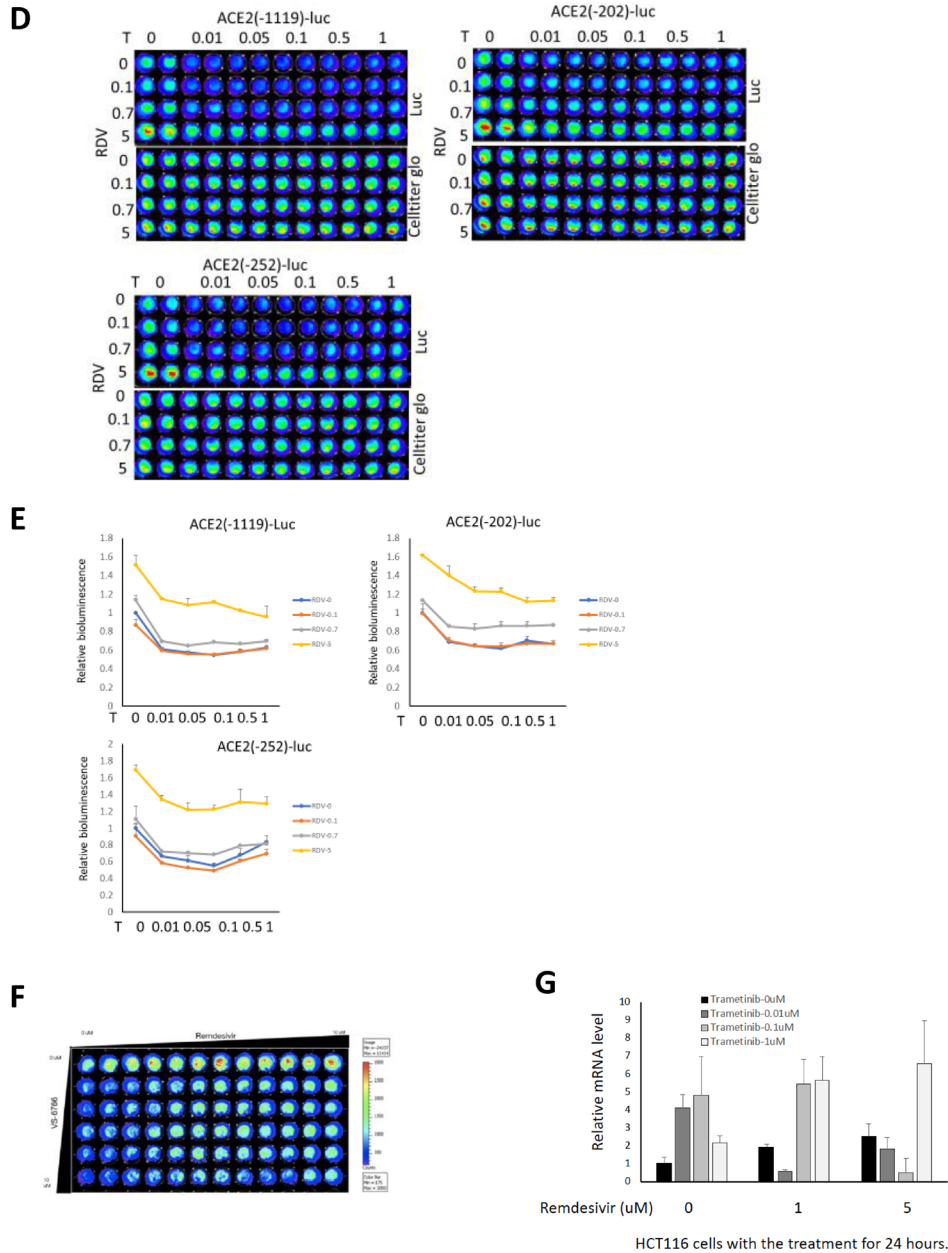

**Supplementary Figure 1: Modulation of multiple different ACE2-promoter luciferase reporters and ACE2 mRNA expression by remdesivir and MEKi in different cell lines. (A)** ACE2(-252) luc reporter assay in Calu-6 cells treated with remdesivir and VS-6766 (upper panel), or remdesivir and trametinib (lower panel). **(B)** ACE2- luc reporter assay in HCT116 cells treated with remdesivir and VS-6766 for 24 hours. **(C)** The relative bioluminescence value in **(B)**. **(D)** ACE2- luc reporter assay in HCT116 cells treated with remdesivir and trametinib for 24 hours. **(E)** The relative bioluminescence value in **(D)**. **(F)** ACE2(-1119)-Luc reporter assay in HCT116 cells treated with remdesivir and VS6766. The data from the luciferase reporter assays **(A–F)** was normalized to cell viability and plotted relative to cells with treated with DMSO as a control. Data are expressed as mean  $\pm$  SD. V, VS-6766 ( $\mu$ M). RDV, Remdesivir ( $\mu$ M). T, Trametinib ( $\mu$ M). **(G)** ACE2 mRNA level in HCT116 cells treated with remdesivir and trametinib for 24 hours. mRNA levels were quantified by qRT-PCR. Data were normalized to GAPDH expression and plotted relative to cells treated with DMSO as a control. Data are expressed as mean  $\pm$  SD.

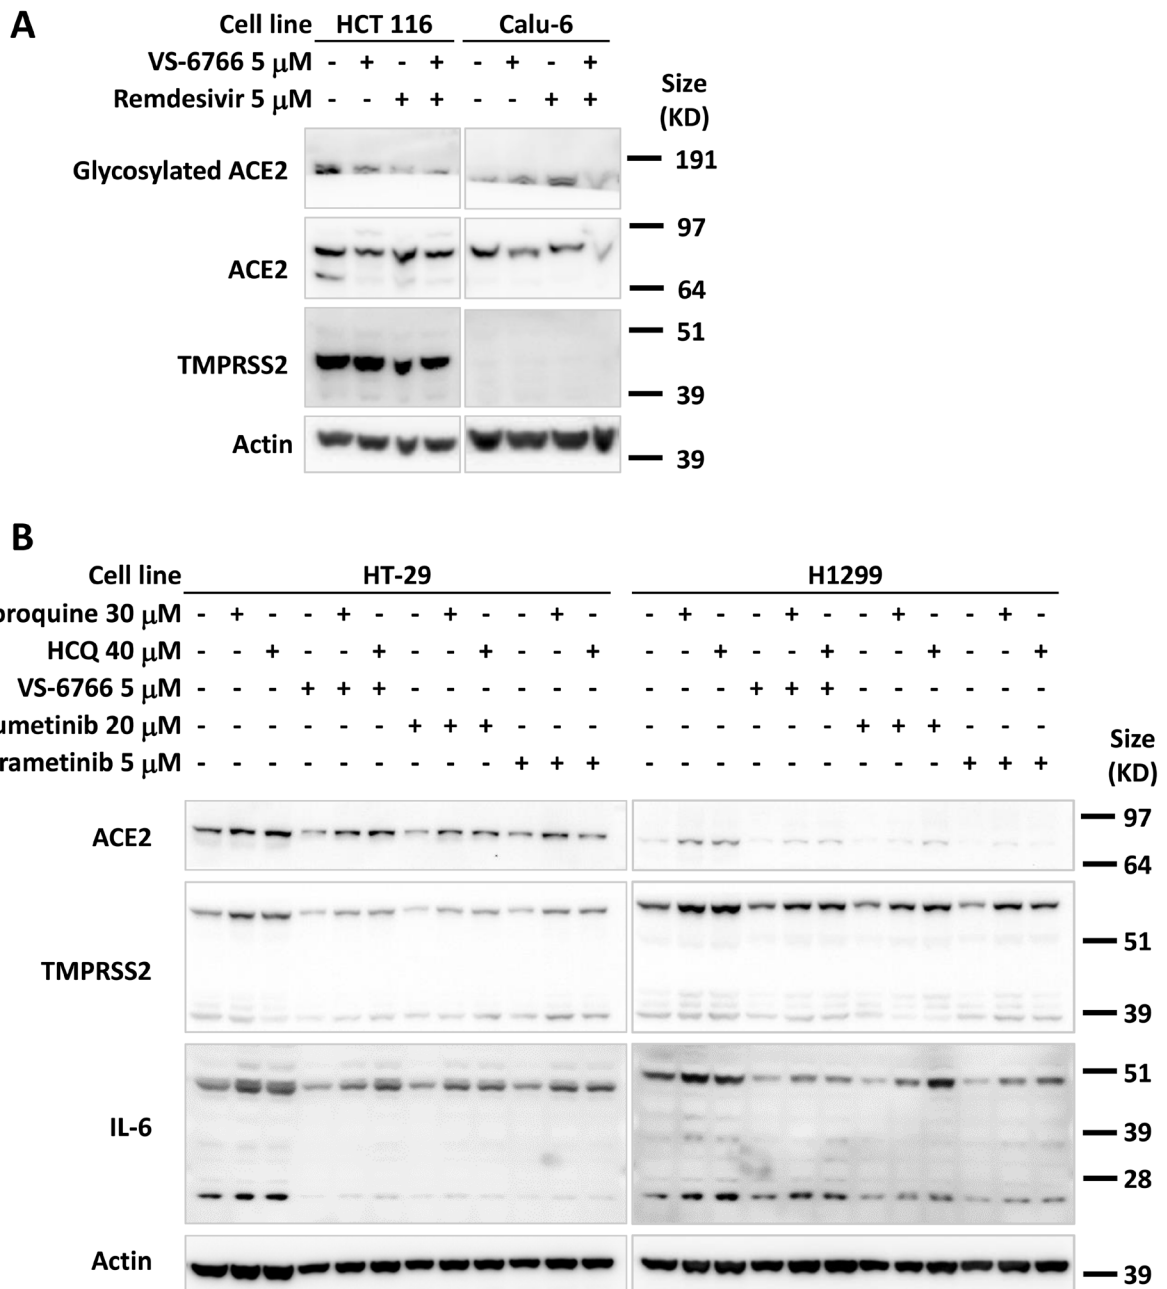

HCQ = Hydroxychloroquine

**Supplementary Figure 2: Effect of remdesivir and VS-6766 on ACE2 and TMPRSS2 in human colorectal and NSCLC cells.** (A) HCT116 human CRC cells and Calu-6 human NSCLC cells were treated with remdesivir and VS-6766 at the indicated doses for 48 hours. Glycosylated ACE2, ACE2 and TMPRSS2 (full-length and Serine Protease-domain) were probed with cell signaling 4355, Abnova PAB13444, and Sigma MABF2158 antibodies.  $\alpha$ -Actin was probed with Sigma A5441 antibody as a loading control. (B) H1299 human NSCLC cells were treated with chloroquine, hydroxychloroquine and MEK inhibitors VS-6766, selumetinib, and trametinib at the indicated doses for 48 hours. Glycosylated ACE2, ACE2 and TMPRSS2 (full-length and Serine Protease-domain) were probed with cell signaling 4355, Abnova PAB13444, and Sigma MABF2158 antibodies.  $\alpha$ -Actin was probed with Sigma A5441 antibody as a loading control.

**A**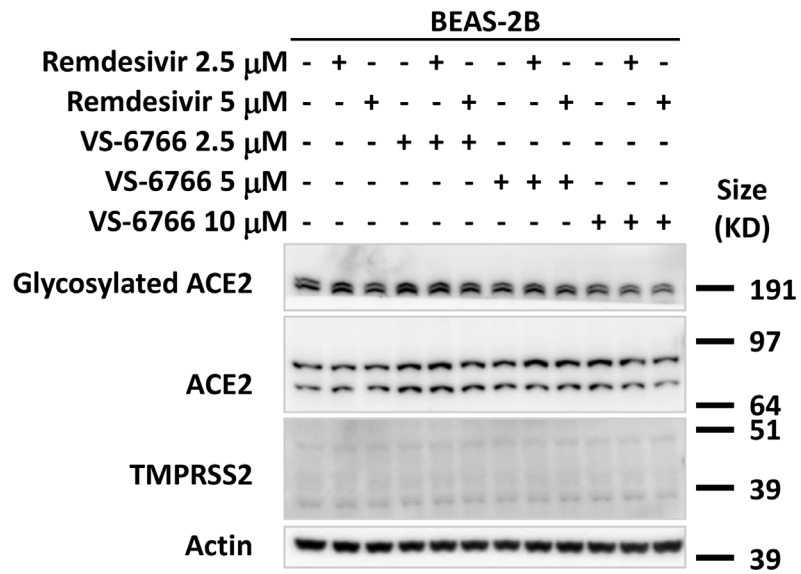**B**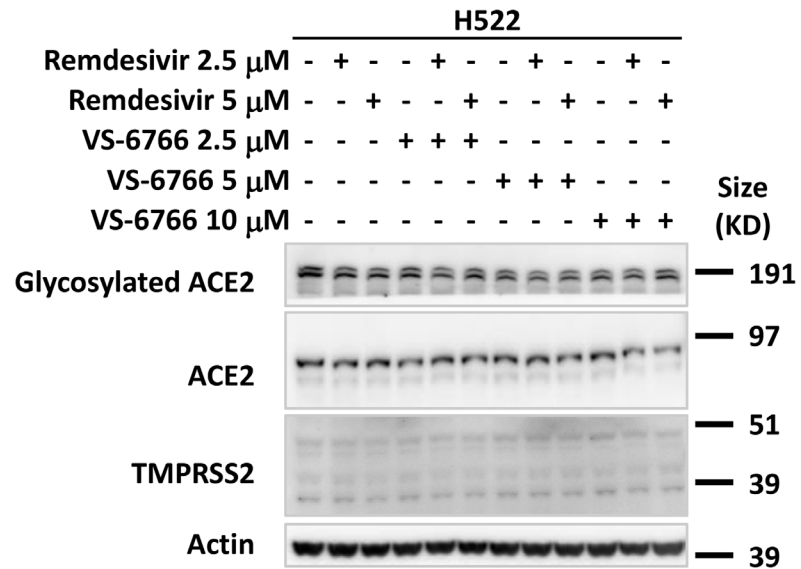**C**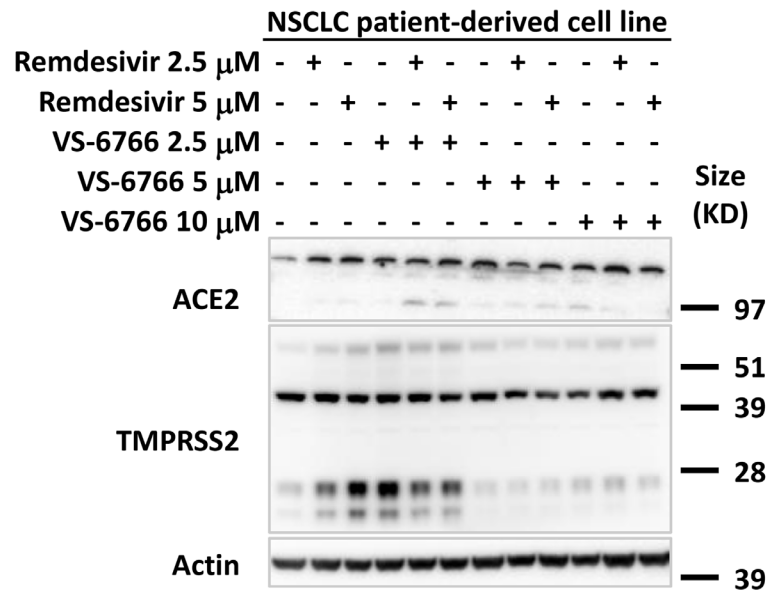



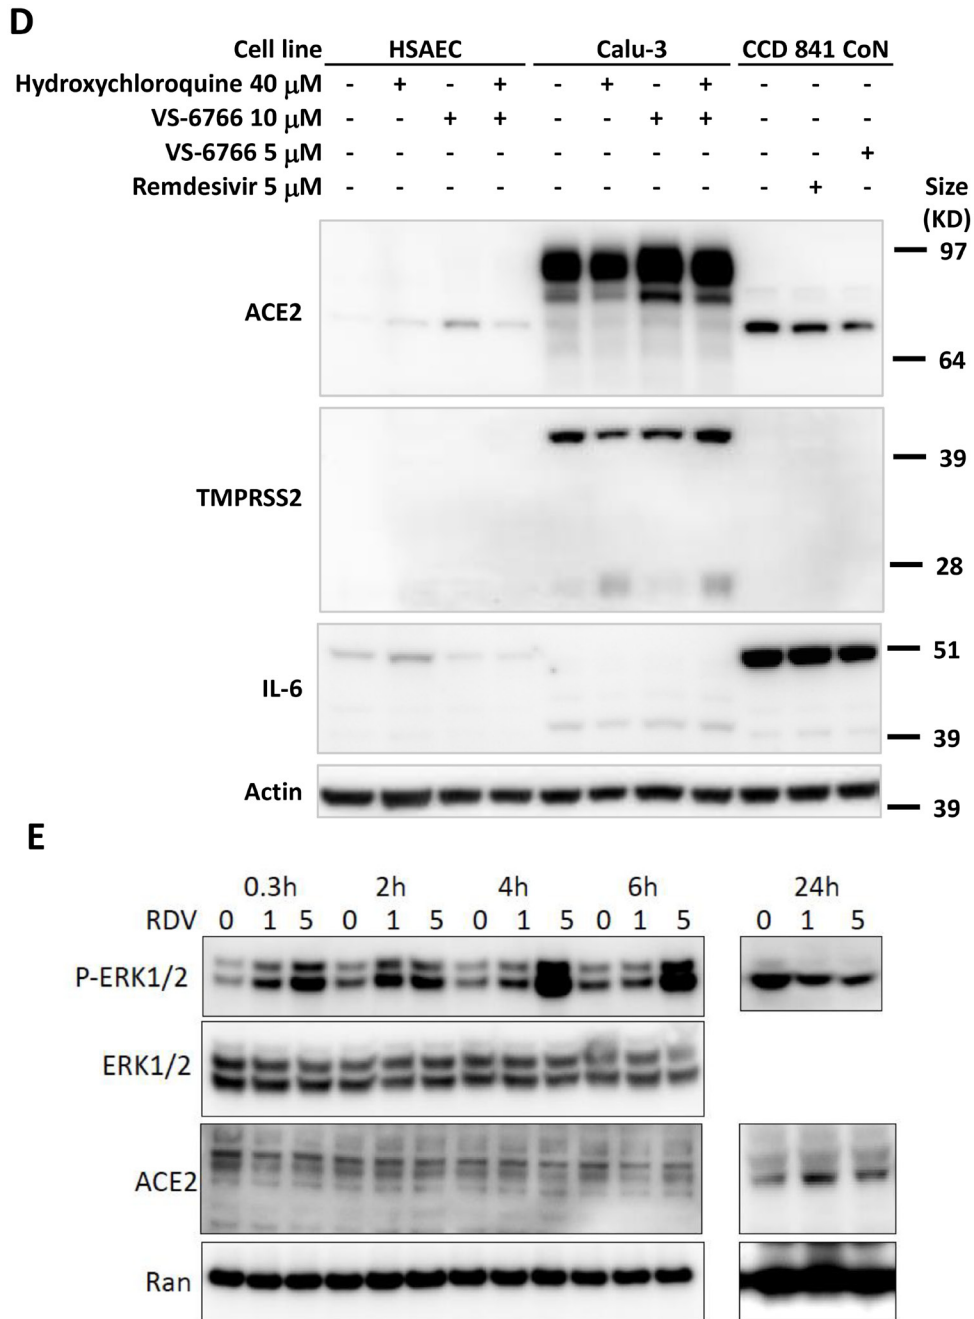

**Supplementary Figure 3: Effects of remdesivir, VS-6766 and Hydroxychloroquine on ACE2, TMPRSS2 and IL-6 in human lung and colon cells and expression of ACE2 and TMPRSS2 in cells of GI tract origin.** (A) BEAS-2B normal human bronchial airway epithelial cells were treated with remdesivir and VS-6766 at the indicated doses for 48 hours. Glycosylated ACE2, ACE2 and TMPRSS2 (full-length and Serine Protease-domain) were probed with cell signaling 4355, Abnova PAB13444, and Sigma MABF2158 antibodies.  $\alpha$ -Actin was probed with Sigma A5441 antibody as a loading control. (B) H522 human NSCLC cells were treated with remdesivir and VS-6766 at the indicated doses for 48 hours. Glycosylated ACE2, ACE2 and TMPRSS2 (full-length and Serine Protease-domain) were probed with cell signaling 4355, Abnova PAB13444, and Sigma MABF2158 antibodies.  $\alpha$ -Actin was probed with Sigma A5441 antibody as a loading control. (C) NSCLC patient-derived cell line was treated with remdesivir and VS-6766 at the indicated doses for 24 hours. ACE2 and TMPRSS2 (full-length and Serine Protease-domain) were probed with Santa Cruz sc-390851 and Sigma MABF2158 antibodies.  $\alpha$ -Actin was probed with Sigma A5441 antibody as a loading control. (D) Human Primary Small Airway Normal Epithelial Cells (HSAEC) and Calu-3 human NSCLC cells (Both are type II alveolar cells) were treated with hydroxychloroquine and VS-6766 at the indicated doses for 24 hours. (E) Calu-6 cells were treated with remdesivir at 0, 1, or 5  $\mu$ M for 0.3, 2, 4, 6, or 24 hr as indicated. Western blots were performed to immunoblot for expression of pERK1/2, ERK1/2, ACE2, or Ran (loading control) as indicated.

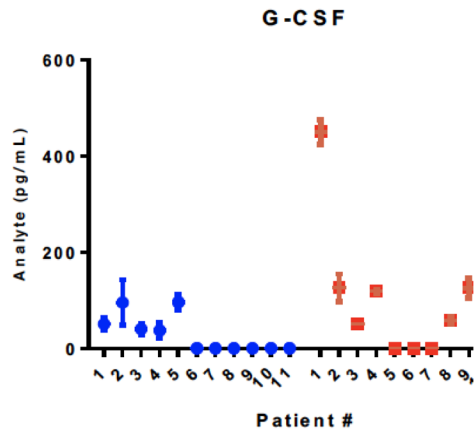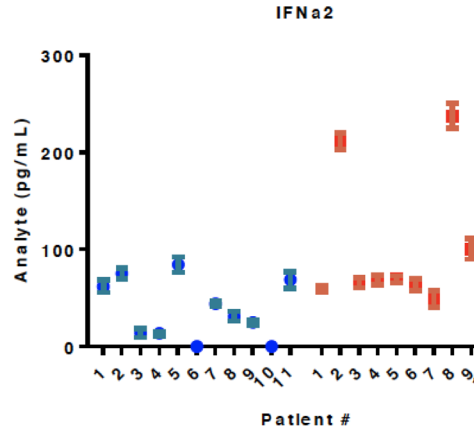

● COVID-19 (-)  
■ COVID-19 (+)

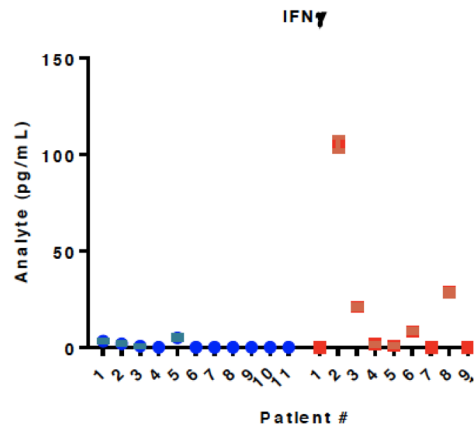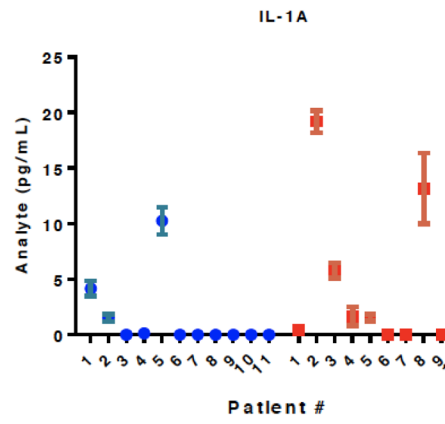

● COVID-19 (-)  
■ COVID-19 (+)

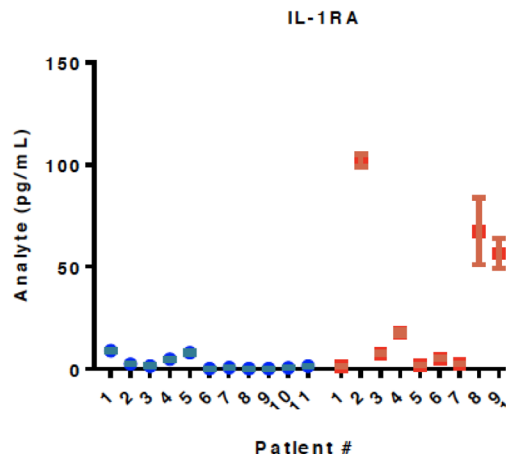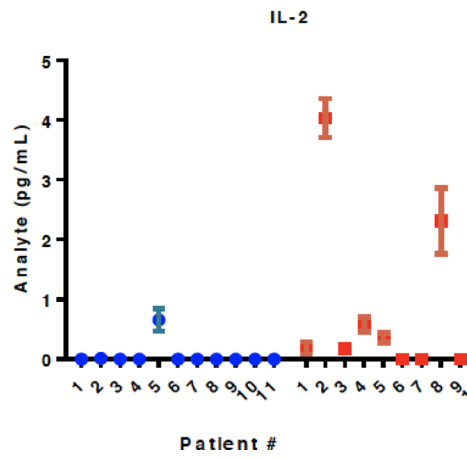

● COVID-19 (-)  
■ COVID-19 (+)

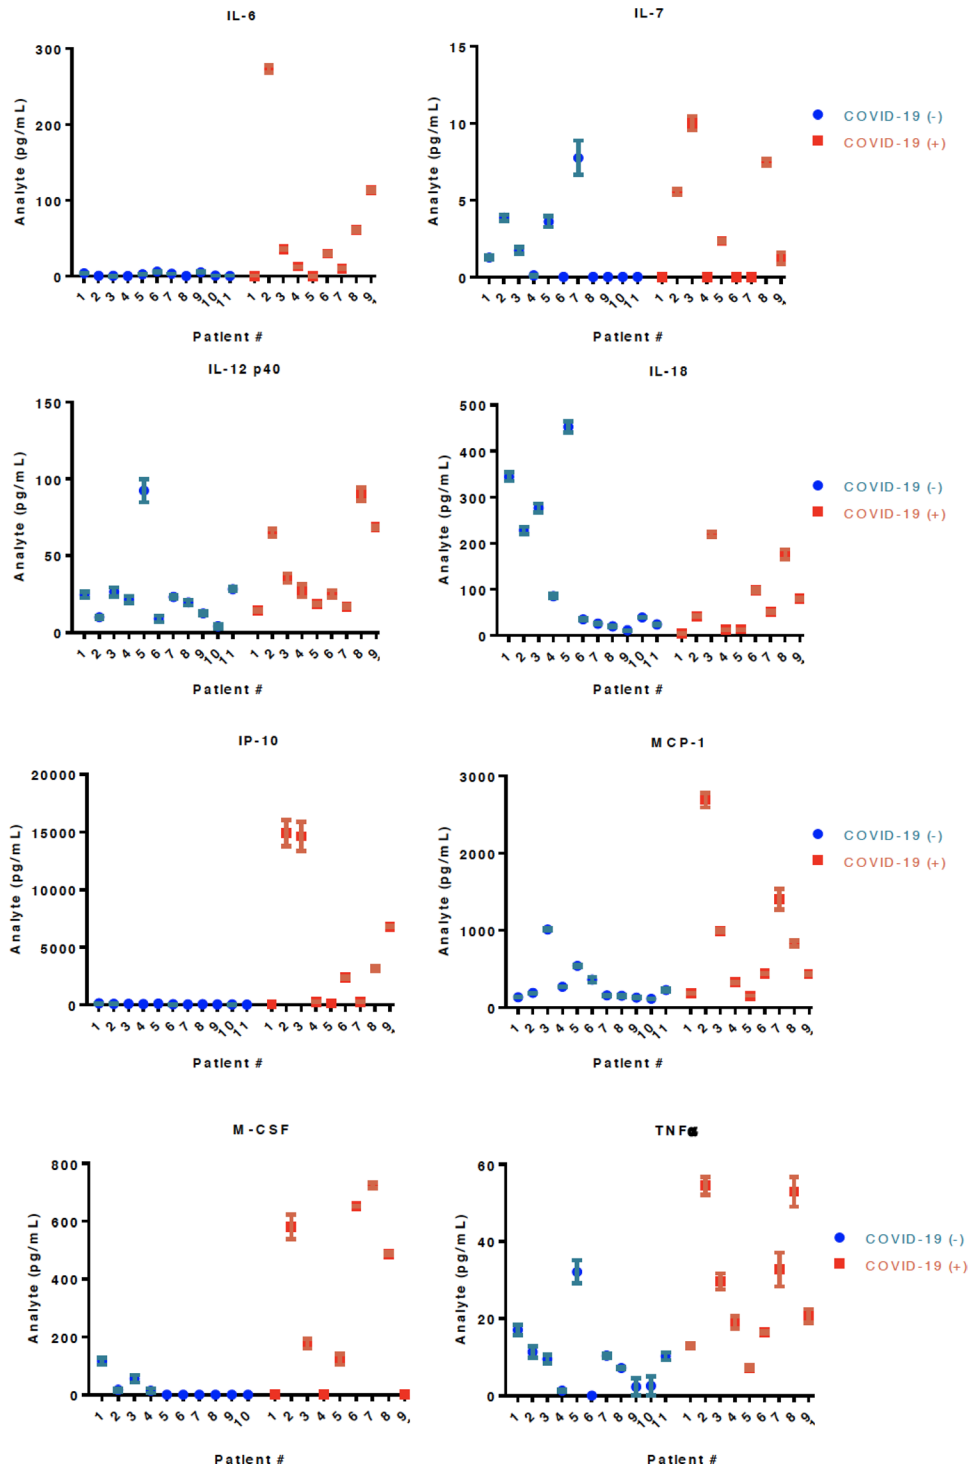

**Supplementary Figure 4: Pilot study of cytokine array profiles in COVID-19(+) patient plasma versus control patient plasma.** Cytokine levels detected in plasma are shown for individual normal ( $N=11$ ) or COVID-19(+) ( $N=9$ ) patients. For the COVID-19(+) patients the patient numbers (1-9) correspond sequentially with the numbers listed in Tables 1–5. For the COVID-19(+) patients the cytokine levels are shown for each patient in Table 5.

### A H460 NSCLC cells

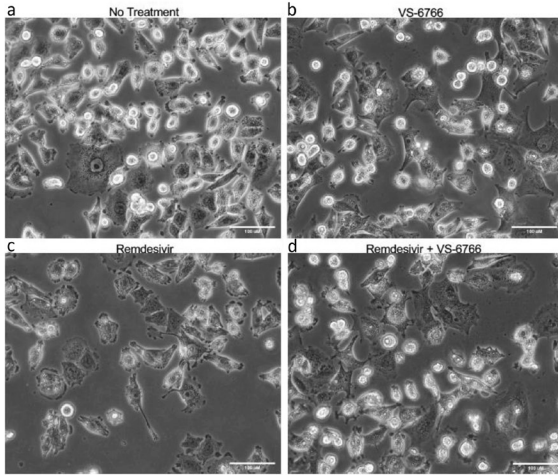

### B Calu-3 NSCLC cells

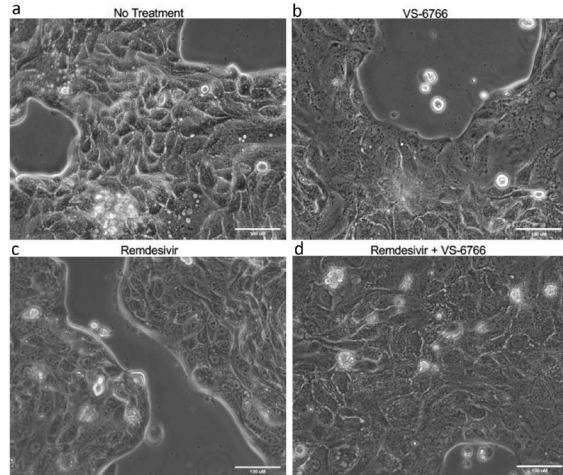

### C MRC-5 lung fibroblasts

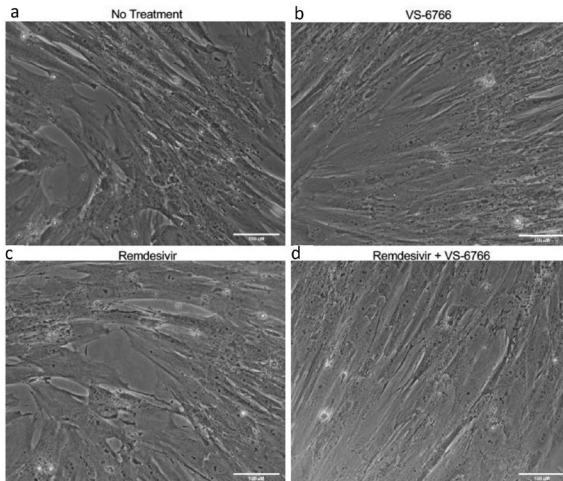

### D BEAS-2B bronchial epithelial cells

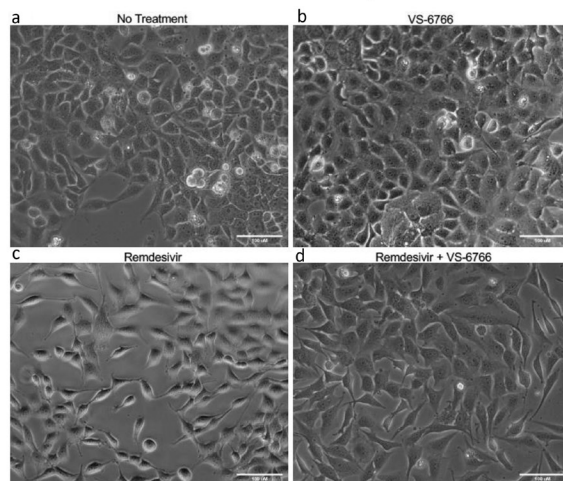

**Supplementary Figure 5:** No morphological changes were observed following drug treatment with VS-6766, remdesivir or the combination in (A) H460 or (B) Calu-3 lung cancer cells, (C) normal lung fibroblasts (MRC-5) or (D) bronchial airway epithelial cells (BEAS-2B). Cells were treated for 48 hours with the following drugs in the sub-panels: (a) control; (b) 10  $\mu$ M VS-6766; (c) 10  $\mu$ M remdesivir; and (d) a combination treatment of 10  $\mu$ M Remdesivir and 10  $\mu$ M VS-6766. Micrographs were taken after 48 hours of treatment. Scale bar represents 100  $\mu$ m.

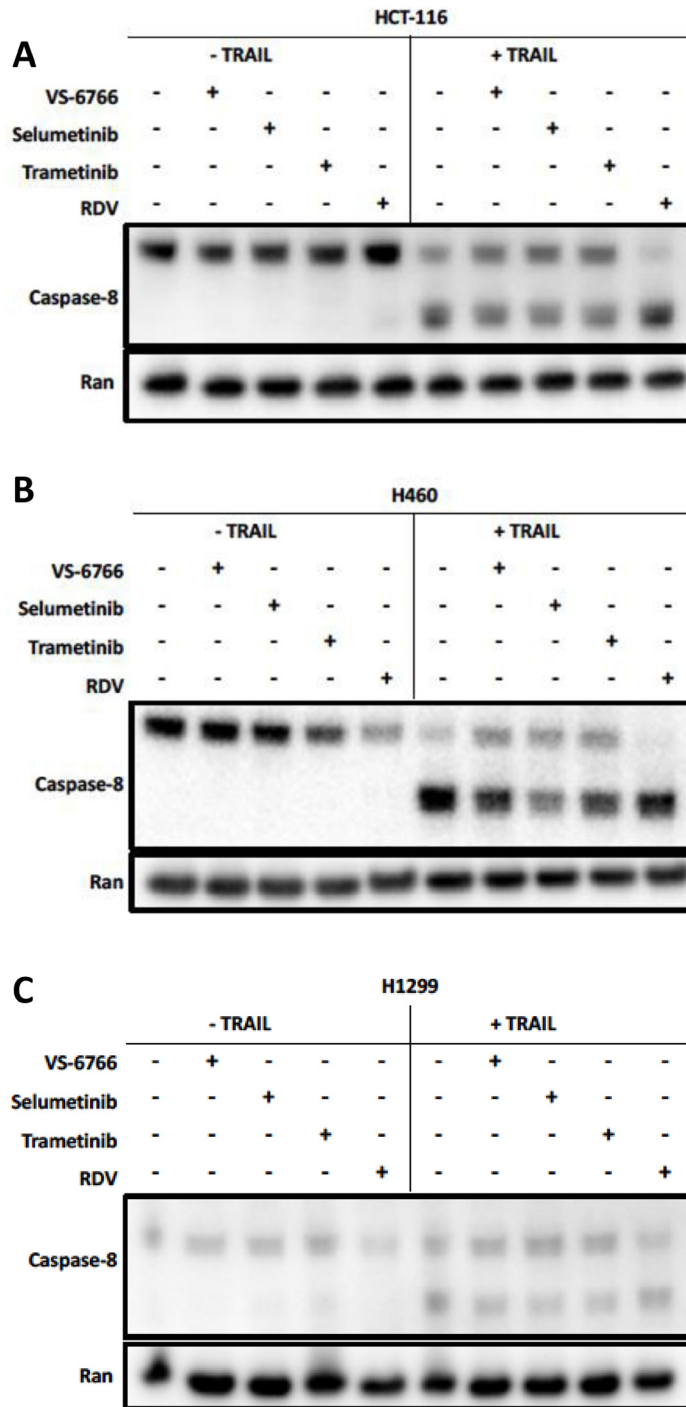

**Supplementary Figure 6: MEK inhibitors or remdesivir do not inhibit TRAIL-mediated apoptosis.** Effects of VS-6766 (5  $\mu$ M), selumetinib (10  $\mu$ M), trametinib (5  $\mu$ M), or remdesivir (5  $\mu$ M) treatment for 24 hours alone or in combination with TRAIL (50 ng/mL) for 4 additional hours on cleaved caspase 8 in HCT116 colorectal cancer (A), H460 (B) or H1299 (C) lung cancer cells.



**A**

|   |                  | 1 | 2 | 3    | 4    | 5     | 6     | 7    | 8    | 9  | 10  | 11  | 12  |
|---|------------------|---|---|------|------|-------|-------|------|------|----|-----|-----|-----|
| A | Chloroquine      | 0 | 0 | 0.78 | 1.56 | 3.125 | 6.25  | 12.5 | 25   | 50 | 100 | 200 | 400 |
| B | Chloroquine      | 0 | 0 | 0.78 | 1.56 | 3.125 | 6.25  | 12.5 | 25   | 50 | 100 | 200 | 400 |
| C | Hydrochloroquine | 0 | 0 | 0.49 | 0.78 | 1.56  | 3.125 | 6.25 | 12.5 | 25 | 50  | 100 | 200 |
| D | VS-6766          | 0 | 0 | 0.08 | 0.16 | 0.31  | 0.63  | 1.25 | 2.5  | 5  | 10  | 20  | 40  |
| E | Selumetinib      | 0 | 0 | 0.08 | 0.16 | 0.31  | 0.63  | 1.25 | 2.5  | 5  | 10  | 20  | 40  |
| F | Trametinib       | 0 | 0 | 0.08 | 0.16 | 0.31  | 0.63  | 1.25 | 2.5  | 5  | 10  | 20  | 40  |
| G | U0126            | 0 | 0 | 0.08 | 0.16 | 0.31  | 0.63  | 1.25 | 2.5  | 5  | 10  | 20  | 40  |
| H | U0126            | 0 | 0 | 0.08 | 0.16 | 0.31  | 0.63  | 1.25 | 2.5  | 5  | 10  | 20  | 40  |

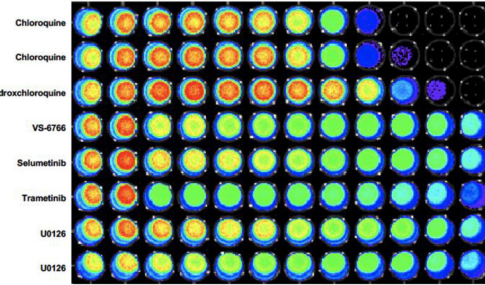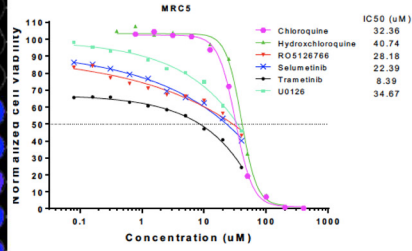

**B**

|   |                  | 1 | 2 | 3    | 4    | 5     | 6     | 7    | 8    | 9  | 10  | 11  | 12  |
|---|------------------|---|---|------|------|-------|-------|------|------|----|-----|-----|-----|
| A | Chloroquine      | 0 | 0 | 0.78 | 1.56 | 3.125 | 6.25  | 12.5 | 25   | 50 | 100 | 200 | 400 |
| B | Chloroquine      | 0 | 0 | 0.78 | 1.56 | 3.125 | 6.25  | 12.5 | 25   | 50 | 100 | 200 | 400 |
| C | Hydrochloroquine | 0 | 0 | 0.49 | 0.78 | 1.56  | 3.125 | 6.25 | 12.5 | 25 | 50  | 100 | 200 |
| D | VS-6766          | 0 | 0 | 0.08 | 0.16 | 0.31  | 0.63  | 1.25 | 2.5  | 5  | 10  | 20  | 40  |
| E | Selumetinib      | 0 | 0 | 0.08 | 0.16 | 0.31  | 0.63  | 1.25 | 2.5  | 5  | 10  | 20  | 40  |
| F | Trametinib       | 0 | 0 | 0.08 | 0.16 | 0.31  | 0.63  | 1.25 | 2.5  | 5  | 10  | 20  | 40  |
| G | U0126            | 0 | 0 | 0.08 | 0.16 | 0.31  | 0.63  | 1.25 | 2.5  | 5  | 10  | 20  | 40  |
| H | U0126            | 0 | 0 | 0.08 | 0.16 | 0.31  | 0.63  | 1.25 | 2.5  | 5  | 10  | 20  | 40  |

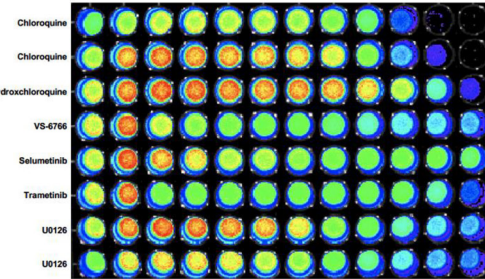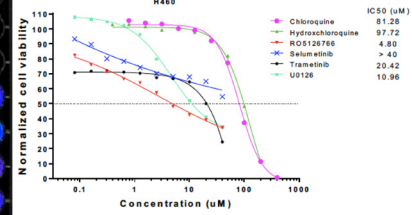

**C**

|   |                  | 1 | 2 | 3    | 4    | 5     | 6     | 7    | 8    | 9  | 10  | 11  | 12  |
|---|------------------|---|---|------|------|-------|-------|------|------|----|-----|-----|-----|
| A | Chloroquine      | 0 | 0 | 0.78 | 1.56 | 3.125 | 6.25  | 12.5 | 25   | 50 | 100 | 200 | 400 |
| B | Chloroquine      | 0 | 0 | 0.78 | 1.56 | 3.125 | 6.25  | 12.5 | 25   | 50 | 100 | 200 | 400 |
| C | Hydrochloroquine | 0 | 0 | 0.49 | 0.78 | 1.56  | 3.125 | 6.25 | 12.5 | 25 | 50  | 100 | 200 |
| D | VS-6766          | 0 | 0 | 0.08 | 0.16 | 0.31  | 0.63  | 1.25 | 2.5  | 5  | 10  | 20  | 40  |
| E | Selumetinib      | 0 | 0 | 0.08 | 0.16 | 0.31  | 0.63  | 1.25 | 2.5  | 5  | 10  | 20  | 40  |
| F | Trametinib       | 0 | 0 | 0.08 | 0.16 | 0.31  | 0.63  | 1.25 | 2.5  | 5  | 10  | 20  | 40  |
| G | U0126            | 0 | 0 | 0.08 | 0.16 | 0.31  | 0.63  | 1.25 | 2.5  | 5  | 10  | 20  | 40  |
| H | U0126            | 0 | 0 | 0.08 | 0.16 | 0.31  | 0.63  | 1.25 | 2.5  | 5  | 10  | 20  | 40  |

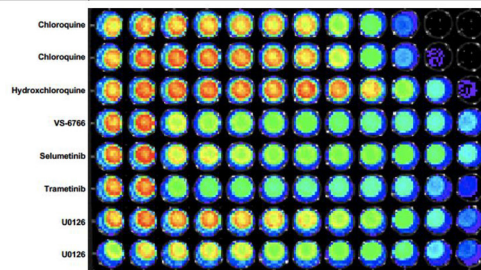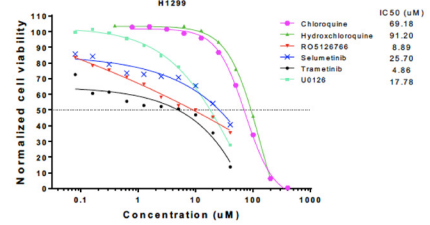

**D**

|   |                  | 1 | 2 | 3    | 4    | 5     | 6     | 7    | 8    | 9  | 10  | 11  | 12  |
|---|------------------|---|---|------|------|-------|-------|------|------|----|-----|-----|-----|
| A | Chloroquine      | 0 | 0 | 0.78 | 1.56 | 3.125 | 6.25  | 12.5 | 25   | 50 | 100 | 200 | 400 |
| B | Chloroquine      | 0 | 0 | 0.78 | 1.56 | 3.125 | 6.25  | 12.5 | 25   | 50 | 100 | 200 | 400 |
| C | Hydrochloroquine | 0 | 0 | 0.49 | 0.78 | 1.56  | 3.125 | 6.25 | 12.5 | 25 | 50  | 100 | 200 |
| D | VS-6766          | 0 | 0 | 0.08 | 0.16 | 0.31  | 0.63  | 1.25 | 2.5  | 5  | 10  | 20  | 40  |
| E | Selumetinib      | 0 | 0 | 0.08 | 0.16 | 0.31  | 0.63  | 1.25 | 2.5  | 5  | 10  | 20  | 40  |
| F | Trametinib       | 0 | 0 | 0.08 | 0.16 | 0.31  | 0.63  | 1.25 | 2.5  | 5  | 10  | 20  | 40  |
| G | U0126            | 0 | 0 | 0.08 | 0.16 | 0.31  | 0.63  | 1.25 | 2.5  | 5  | 10  | 20  | 40  |
| H | U0126            | 0 | 0 | 0.08 | 0.16 | 0.31  | 0.63  | 1.25 | 2.5  | 5  | 10  | 20  | 40  |

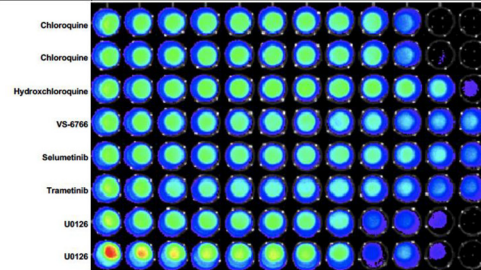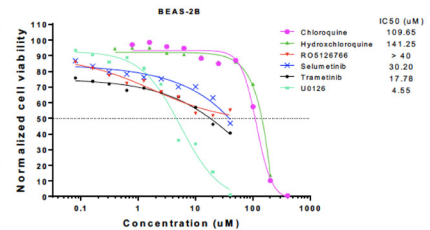



**Supplementary Figure 7:** Cell viability assay of MRC-5 (A), H460 (B), H1299 (C) and BEAS-2B (D) treated with Chloroquine, Hydroxychloroquine and MEK inhibitors (VS-6766, Selumetinib, Trametinib and U0126). MRC-5 normal human lung fibroblast cells, H460 and H1299 human NSCLC cells, and BEAS-2B normal human bronchial airway epithelial cells were treated as indicated for 72 hours and CellTiter-Glo was added to acquire cell viability images with the IVIS system. GraphPad Prism 6 was used to plot the dose-response curve and calculate the IC50 values.

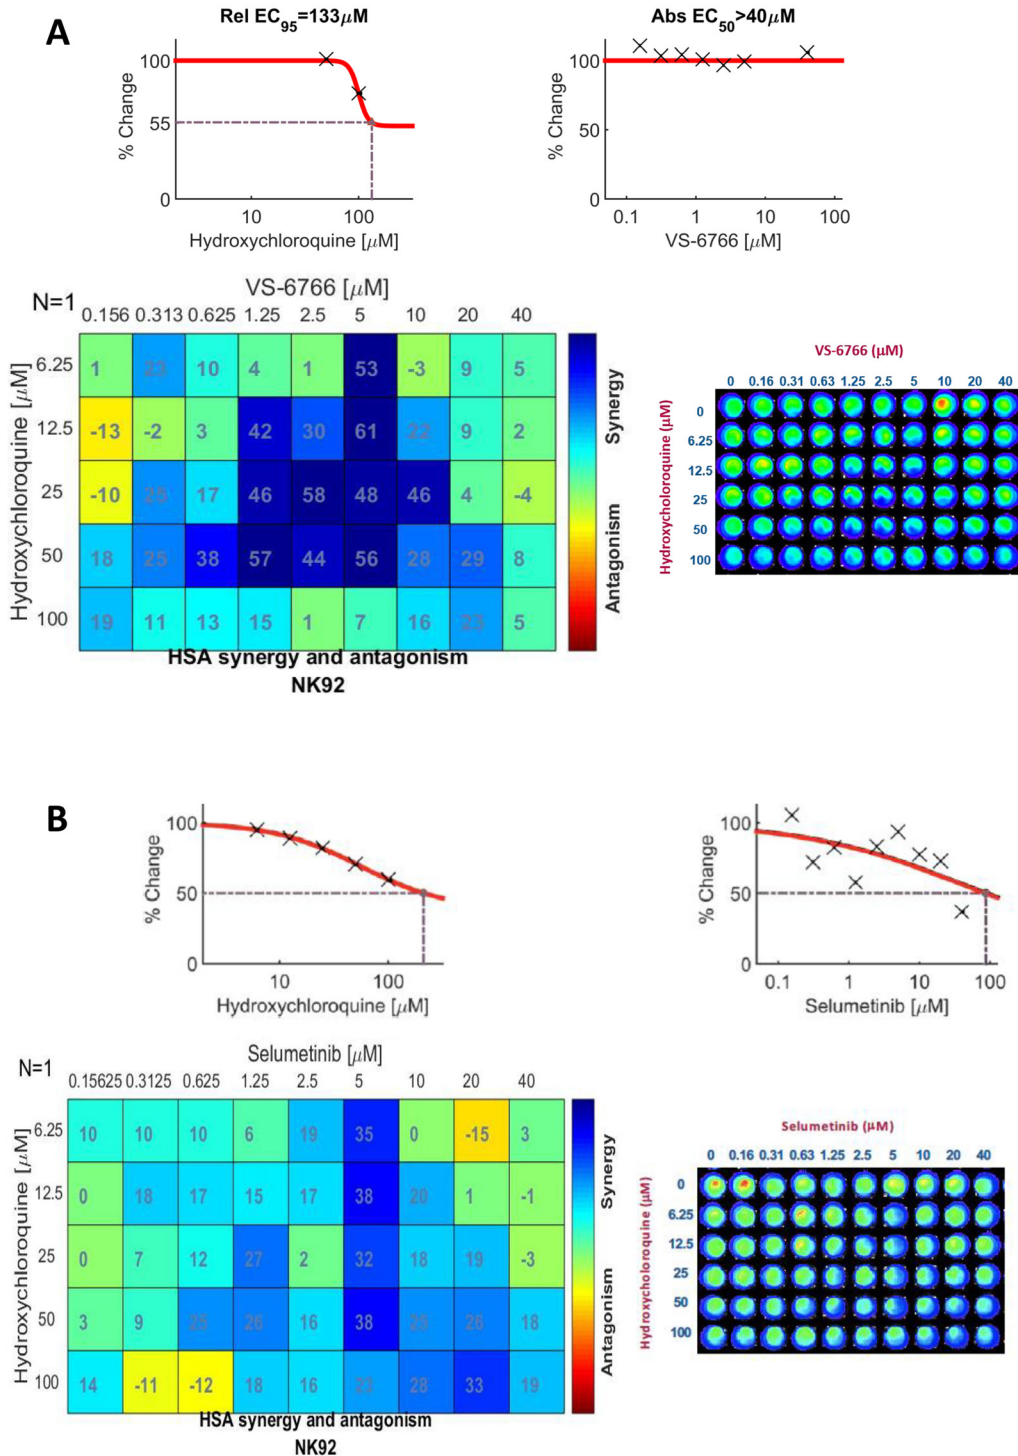

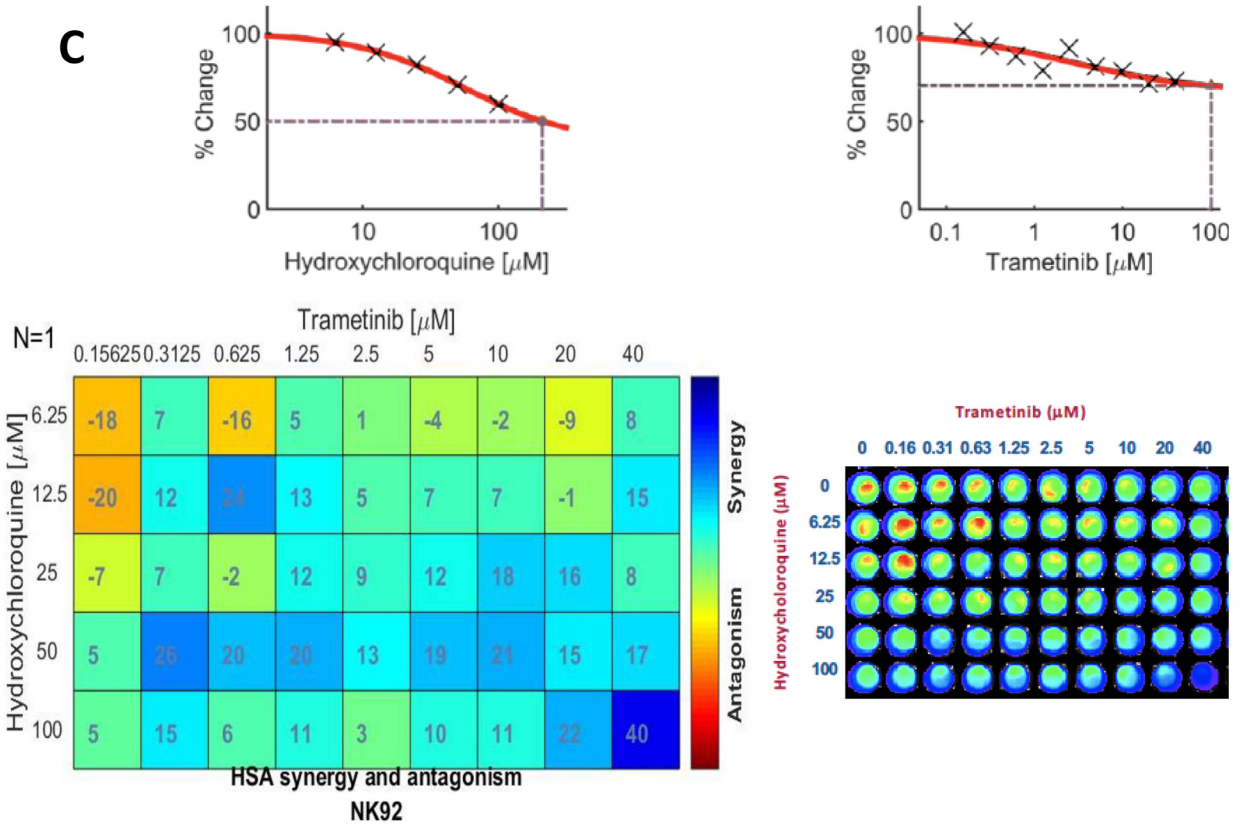

**Supplementary Figure 8:** Combinational effect of Hydroxychloroquine and MEK inhibitors VS-6766 (A), Selumetinib (B) and Trametinib (C) on cell viability in TALL-104 cells. TALL-104 T cells were treated as indicated for 72 hours and CellTiter-Glo was added to acquire cell viability images with the Xenogen IVIS system. Combeneft was used to plot single agent dose response and synergy distribution matrix.

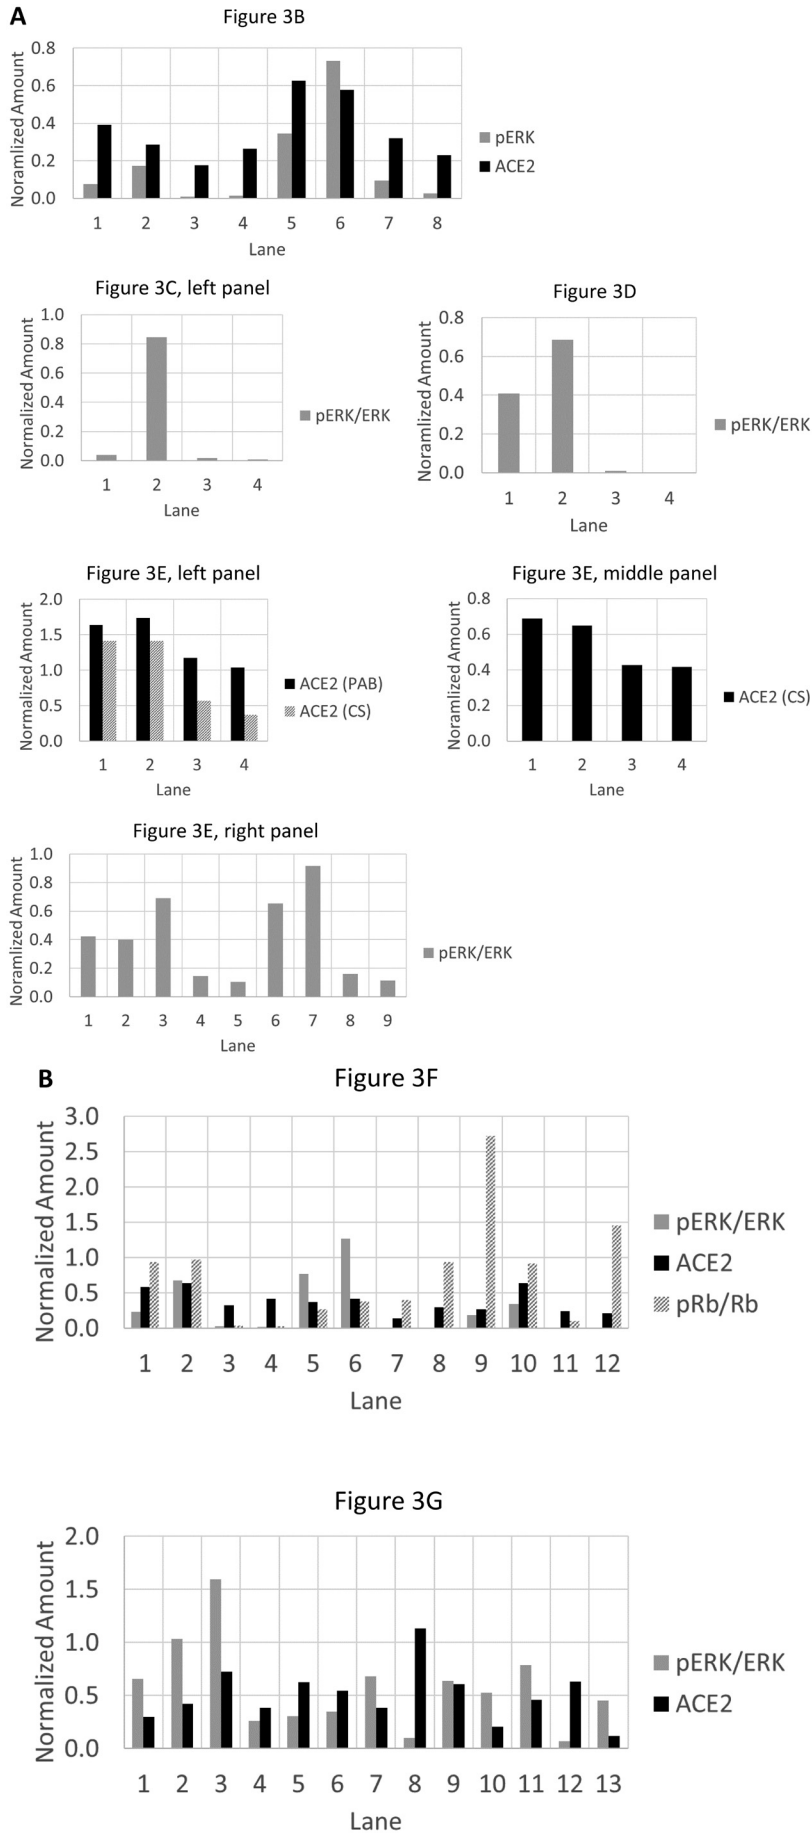

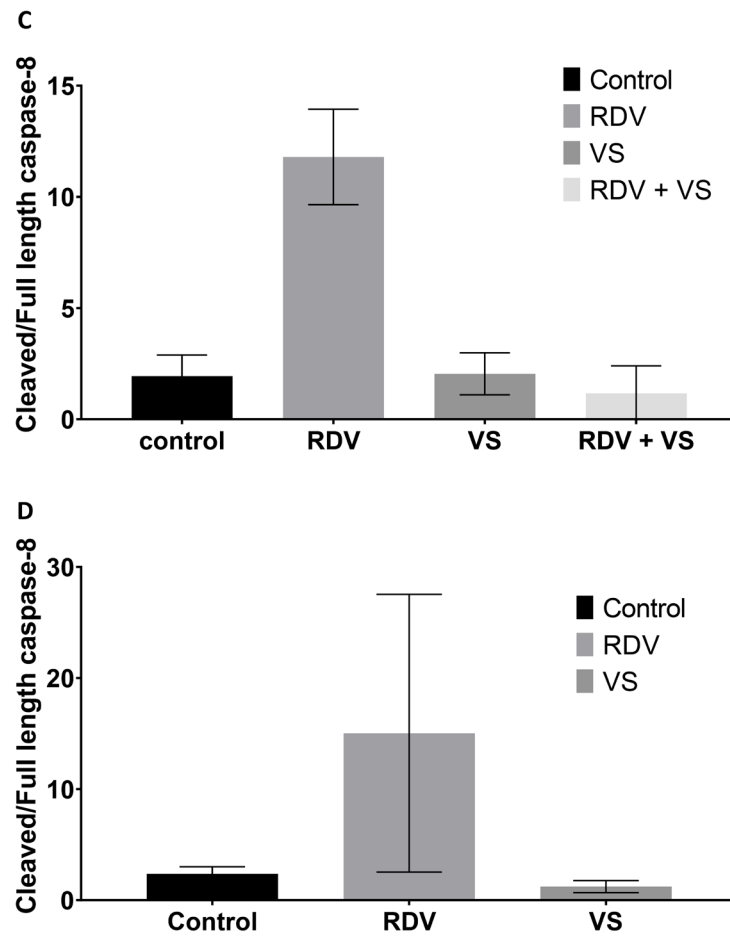

**Supplementary Figure 9: Quantification of Western blots.** ImageJ was used to quantify protein amounts from western blots shown in Figure 3B–3G (A–B). Cleaved and full-length caspase-8 were quantified from Figure 5G (C) and Figure 5F (D) as well as from additional experimental replicates. Standard deviation was calculated from 3–4 (C) or 2 (D) replicates.

**A**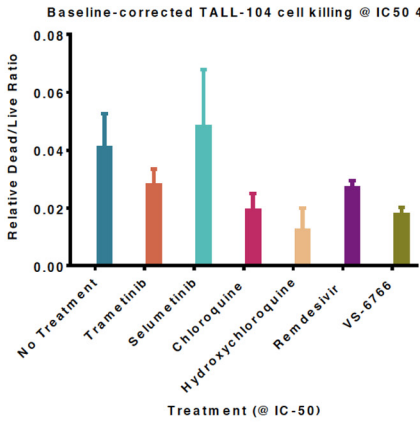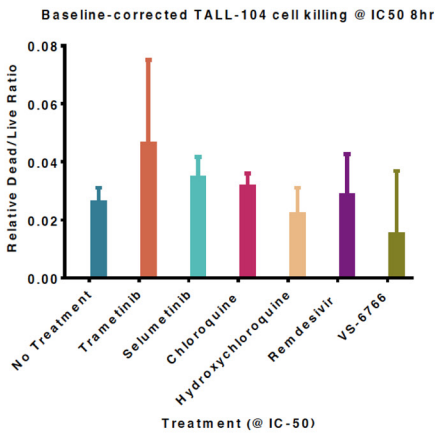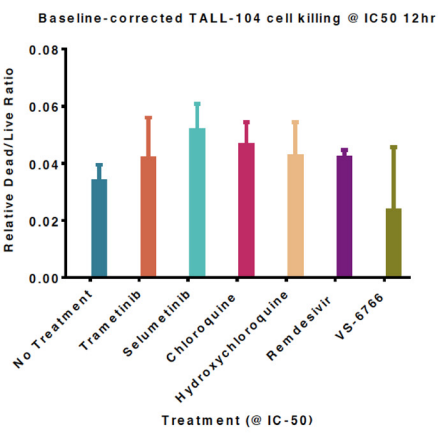**B**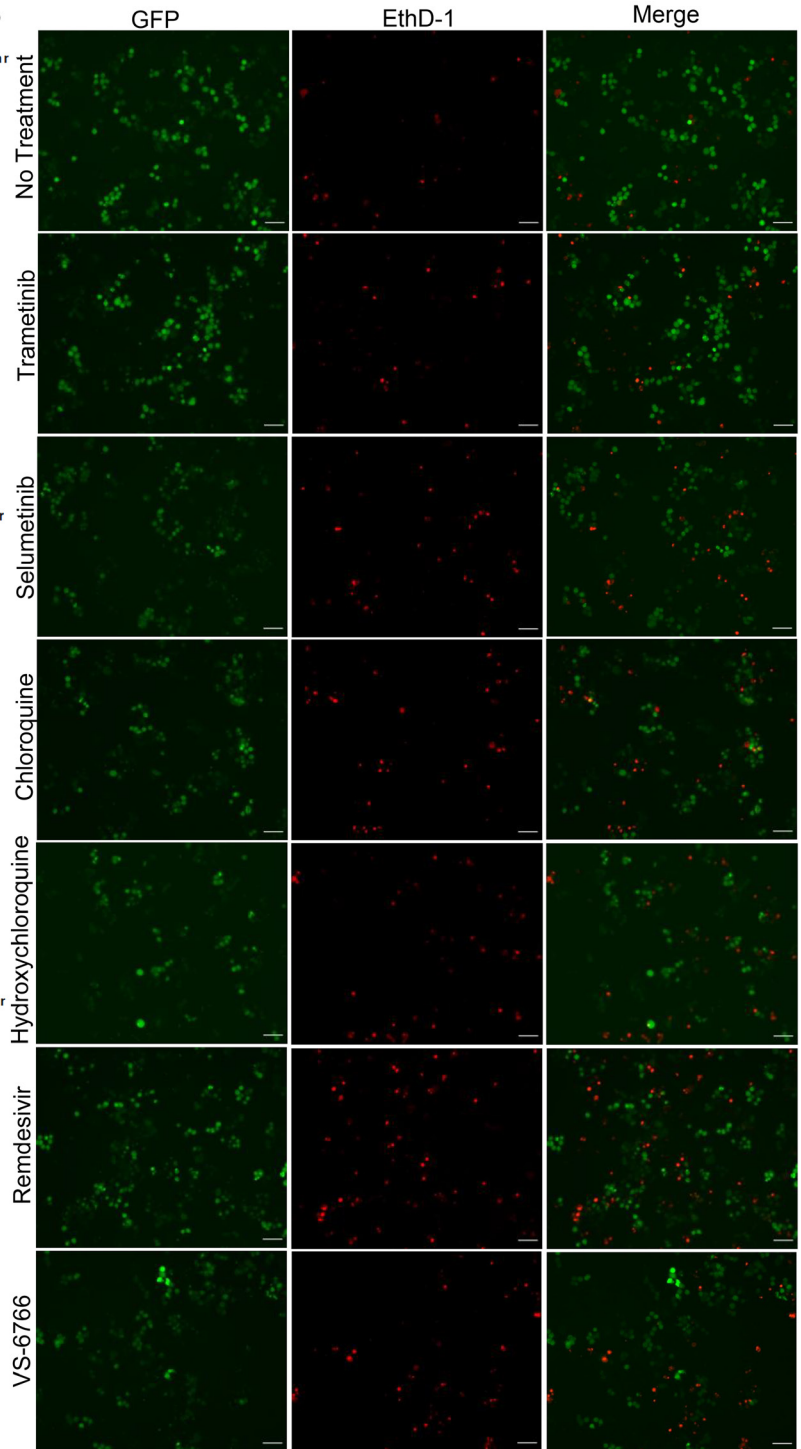

C

Tumor Cells Alone

Tumor Cells After TALL-104 Co-Culture

No Treatment

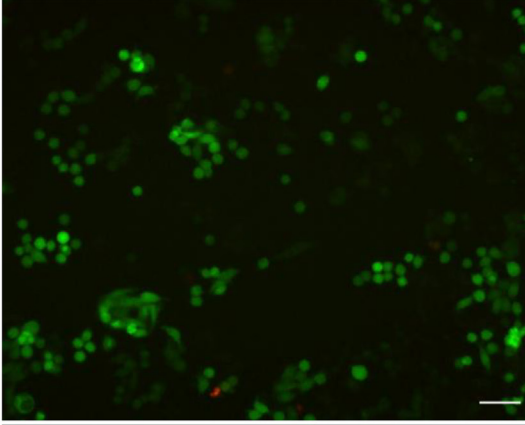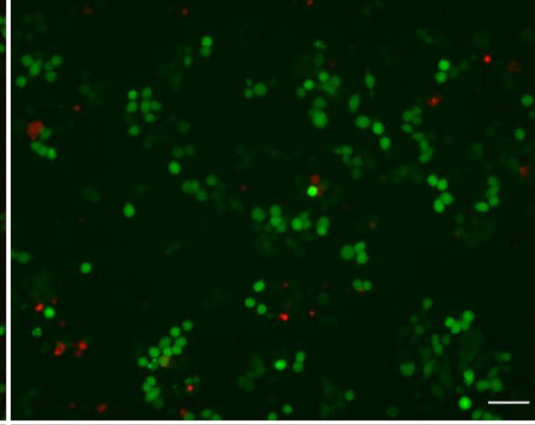

Trametinib

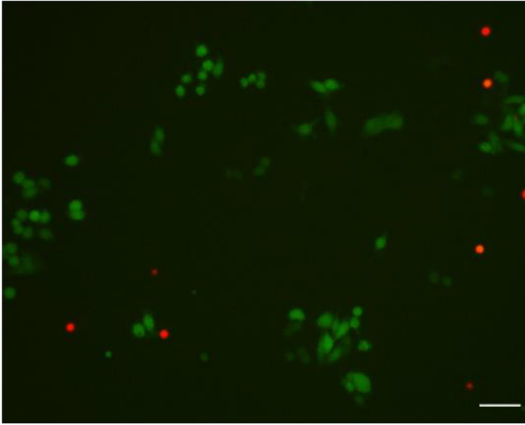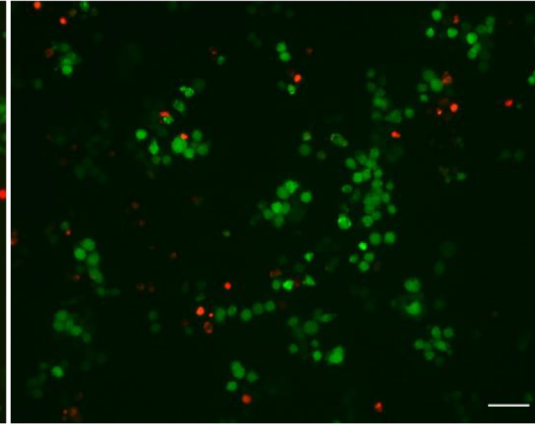

Selumetinib

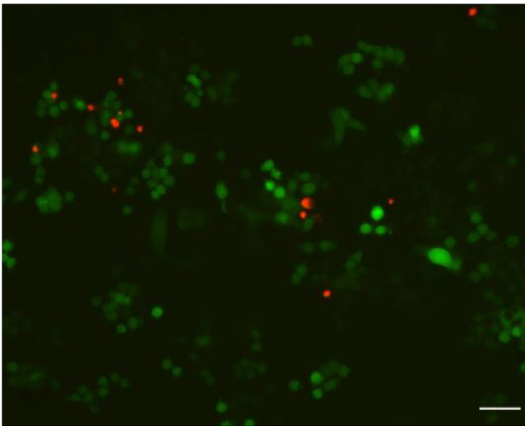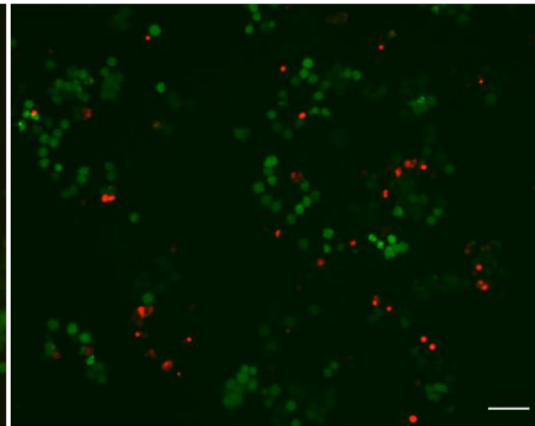

VS-6766

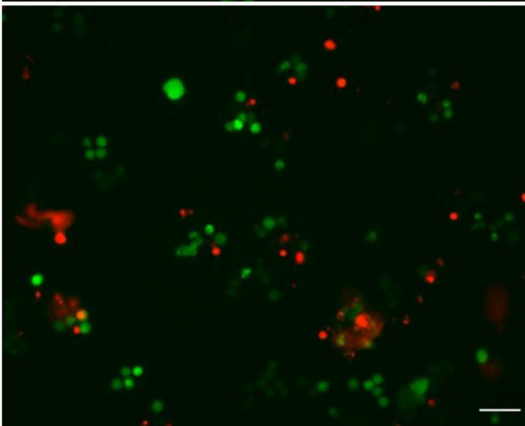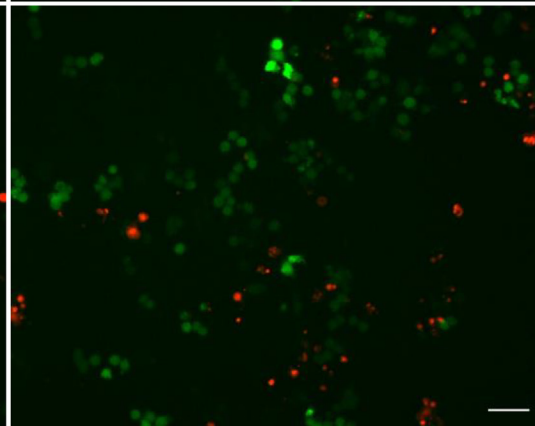



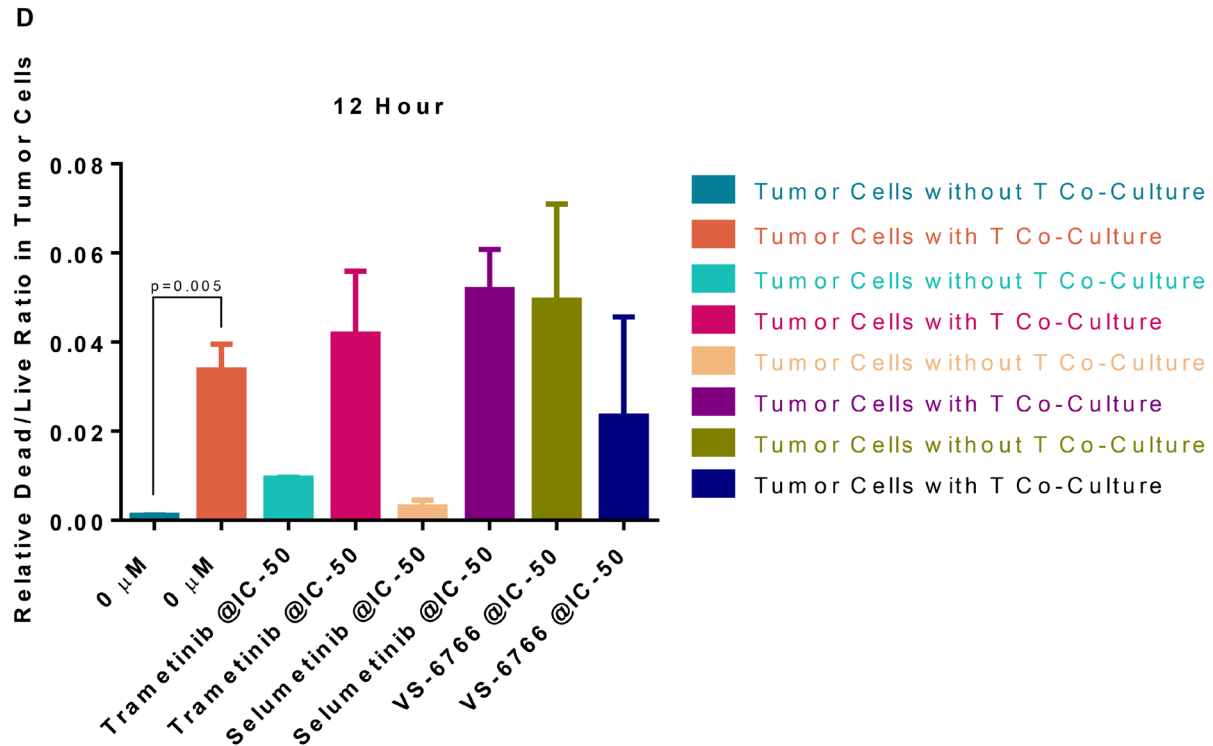

**Supplementary Figure 10: No effect observed on T cell activity by MEK inhibitor treatment at IC-50 doses.** Green fluorescent SW480 tumor cells were co-cultured with TALL-104 T cells at a 1:1 effector target cell ratio (E:T) for indicated timepoints and imaged. Cells were treated with indicated drug at IC-50 doses. (A) Quantification of dead/live ratio after 4, 8 and 12 hours of treatment by drugs as indicated. *P* values are displayed on graph and were calculated using unpaired *t* tests. (B) Fluorescent microscopy of GFP+ SW480 tumor cells before and after indicated treatment conditions. Ethidium homodimer was used to visualize dead cells. 10 magnification. Scale bars indicate 100 μM. (C) Images showing GFP+ tumor target cell cytotoxic effects of MEK inhibitors alone or in addition to TALL-104 cells. Ethidium homodimer was used to visualize dead cells. (D) Quantification of tumor target cell cytotoxic effects of MEK inhibitors alone or in addition to TALL-104 cells. *P* values are displayed on graph and were calculated using unpaired *t* tests.

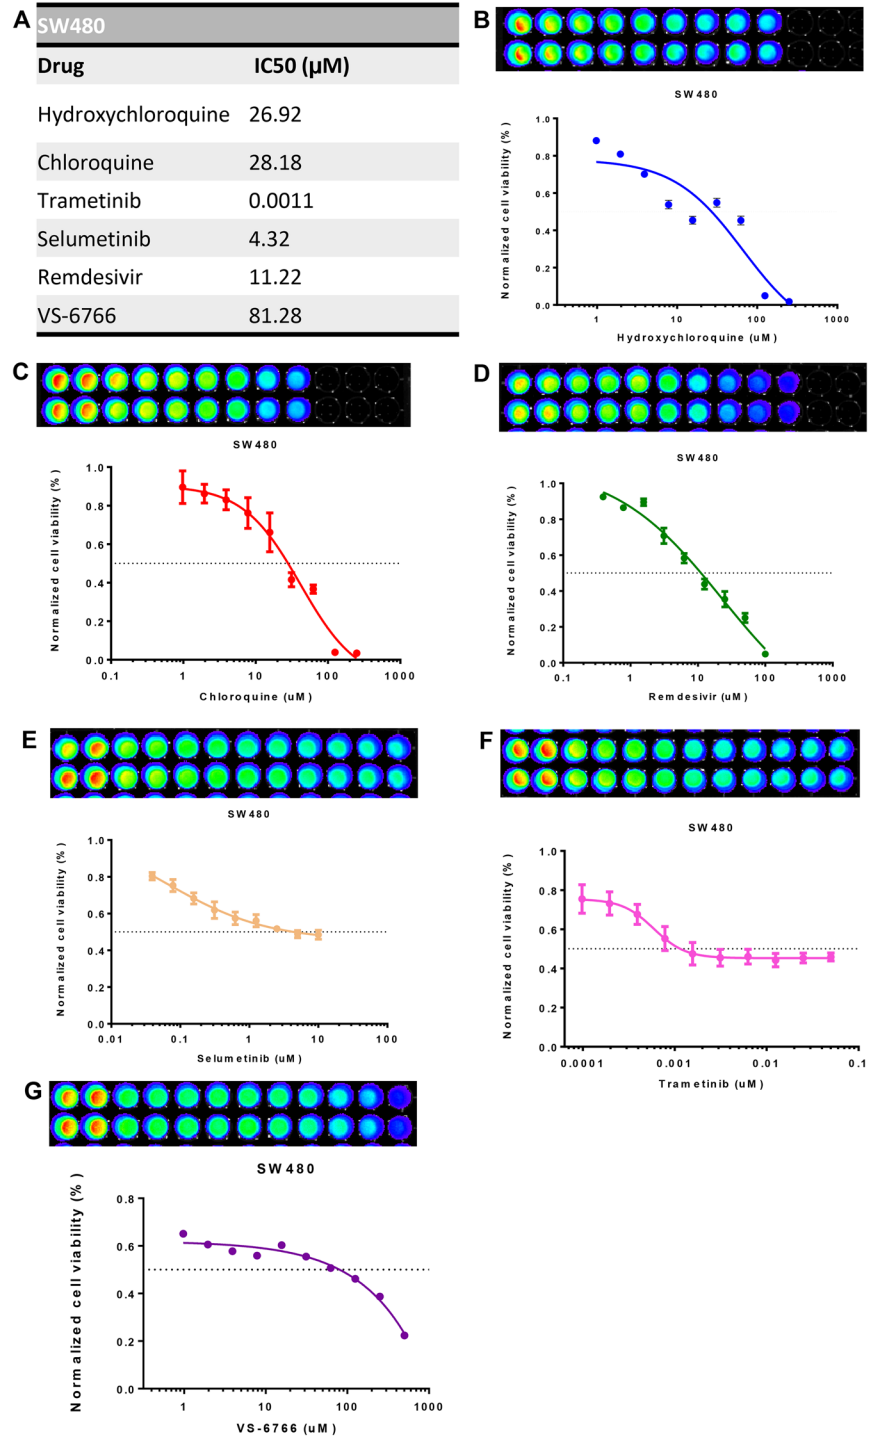

**Supplementary Figure 11:** IC-50 values for SW480 cell line (A) as determined by cell viability assays of SW480 treated with Hydroxychloroquine (B), Chloroquine (C), Remdesivir (D), and MEK inhibitors Selumetinib, Trametinib, and VS-6766 (E-G). SW480 tumor cells were treated as indicated for 72 hours and CellTiter-Glo was added to acquire cell viability images with the IVIS system. GraphPad Prism 6 was used to plot the dose-response curve using a non-linear regression curve fit and to calculate the IC50 values.

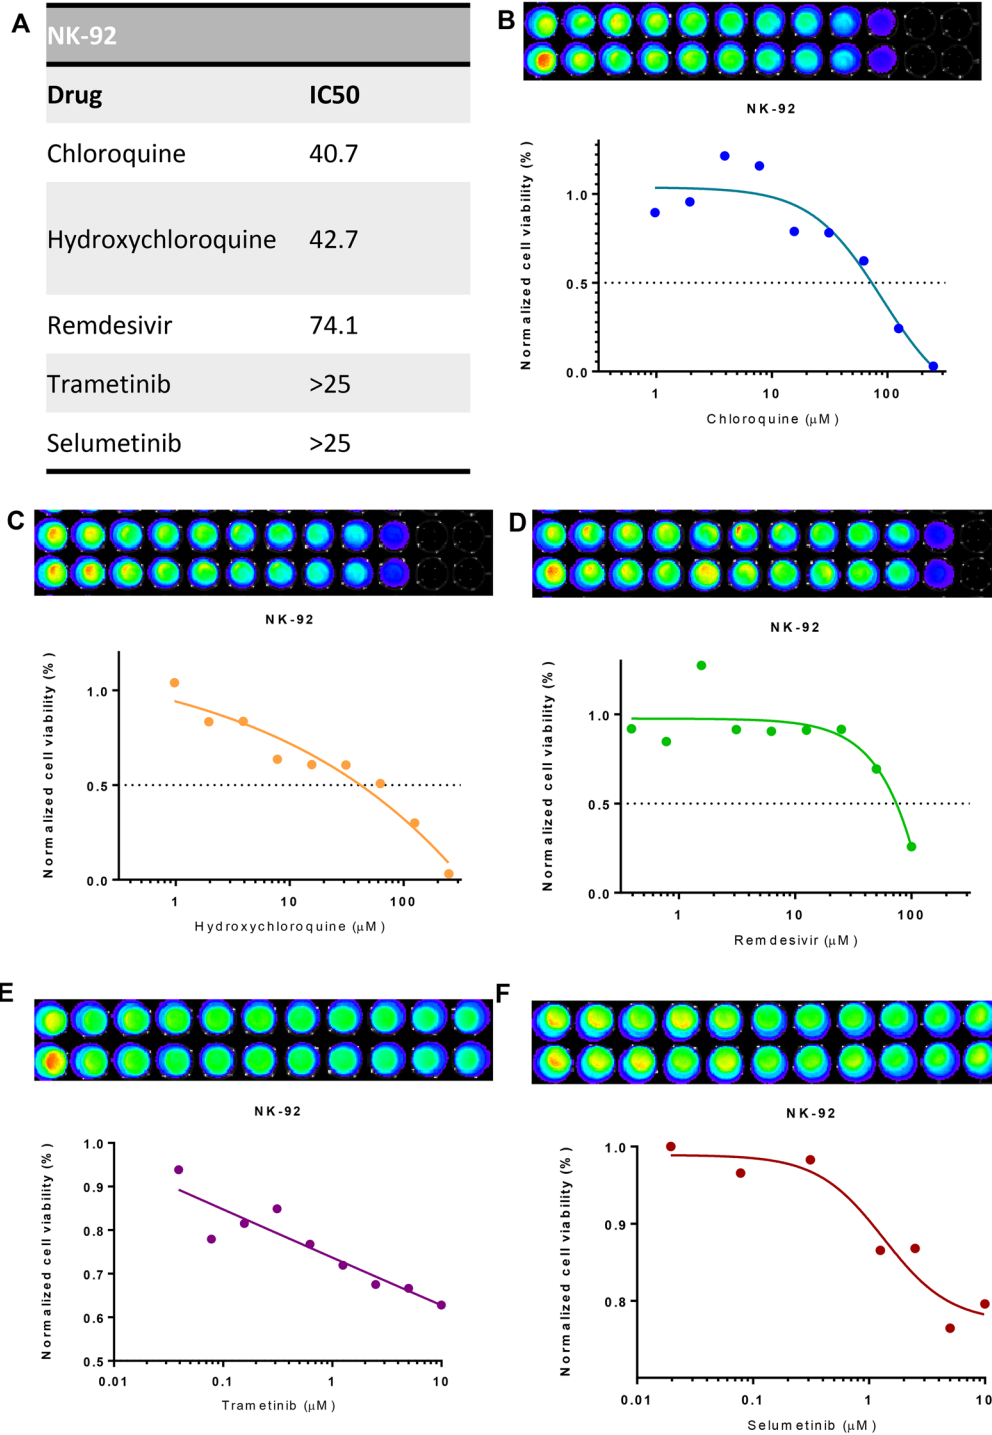

**Supplementary Figure 12:** IC-50 values for NK-92 cell line (A) as determined by cell viability assays of NK-92 cells treated with Chloroquine (B), Hydroxychloroquine (C), Remdesivir (D), and MEK inhibitors Trametinib (E) and Selumetinib (F). NK-92 natural killer cells were treated as indicated for 72 hours and CellTiter-Glo was added to acquire cell viability images with the IVIS system. GraphPad Prism 6 was used to plot the dose-response curve using a non-linear regression curve fit and to calculate the IC50 values.

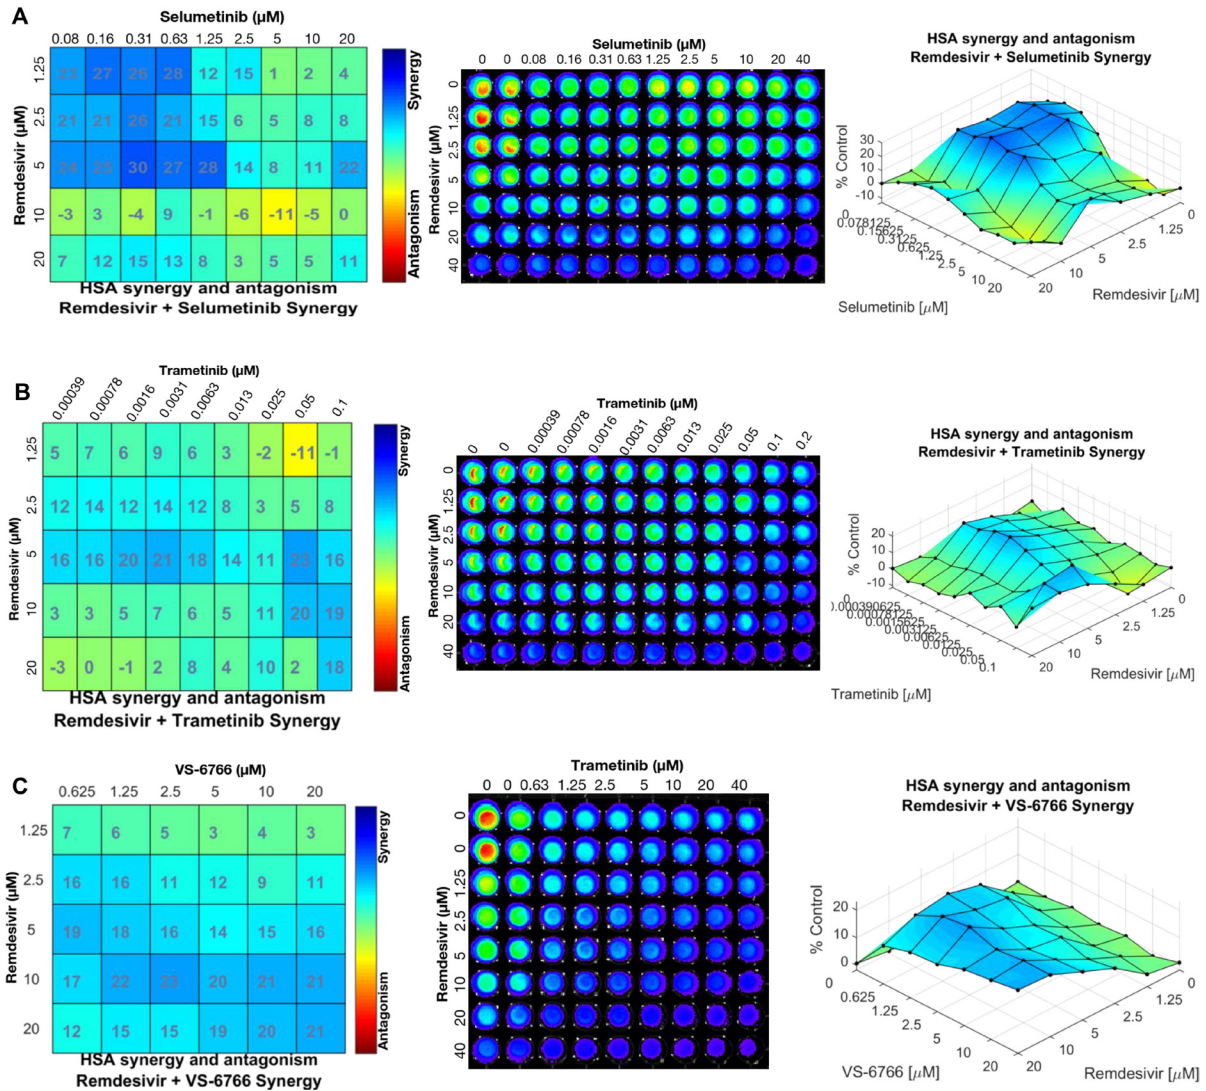

**Supplementary Figure 13:** Combinational effect of Remdesivir and MEK inhibitors Selumetinib (A), Trametinib (B) and VS-6766 (C) on cell viability in SW480 tumor cells. SW480 tumor cells were treated as indicated for 72 hours and CellTiter-Glo was added to acquire cell viability images with the Xenogen IVIS system. Combeneft was used to plot synergy distribution matrices and combination dose response surface models.

**Supplementary Table 1: Patient history.** See Supplementary Table 1

**Supplementary Table 2: Patient symptoms.** See Supplementary Table 2

**Supplementary Table 3: Interventions and medications in the emergency department.** See Supplementary Table 3

**Supplementary Table 4: COVID(+) patient analyte values (pg/mL).** See Supplementary Table 4
